# Supplementary material for: Benign Prostatic Hyperplasia and the Risk of Prostate Cancer and Bladder Cancer: A Meta-Analysis of Observational Studies
Source: PubMed Central journal article supplement (PMC4863764; doi:10.1097/md.0000000000003493), 2016-05-06
Supplement: medi-95-e3493-s001.pdf [file medi-95-e3493-s001.pdf]

**Supplemental Digital Content-Table 1. Quality assessment of included case-control studies**

|                | Selection                        |                                 |                       | Comparability          |                                                                            | Exposure                  |                                                     |                   |
|----------------|----------------------------------|---------------------------------|-----------------------|------------------------|----------------------------------------------------------------------------|---------------------------|-----------------------------------------------------|-------------------|
|                | Is the case definition adequate? | Representativeness of the cases | Selection of Controls | Definition of Controls | Comparability of cases and controls on the basis of the design or analysis | Ascertainment of exposure | Same method of ascertainment for cases and controls | Non-Response rate |
| Armenian 1974  | 1                                | 1                               | 0                     | 1                      | 2                                                                          | 1                         | 1                                                   | 1                 |
| Mishina 1985   | 1                                | 1                               | 0                     | 1                      | 2                                                                          | 1                         | 1                                                   | 0                 |
| Simons 1993    | 1                                | 1                               | 0                     | 1                      | 2                                                                          | 1                         | 1                                                   | 0                 |
| Wei 1994       | 1                                | 0                               | 0                     | 1                      | 1                                                                          | 1                         | 1                                                   | 0                 |
| Wang 1996      | 1                                | 0                               | 1                     | 1                      | 1                                                                          | 1                         | 1                                                   | 0                 |
| Zhu 1996       | 1                                | 0                               | 0                     | 1                      | 2                                                                          | 1                         | 1                                                   | 1                 |
| An 2000        | 1                                | 0                               | 1                     | 1                      | 2                                                                          | 1                         | 1                                                   | 0                 |
| Coker 2004     | 1                                | 1                               | 1                     | 1                      | 2                                                                          | 1                         | 1                                                   | 0                 |
| Liu 2007       | 1                                | 0                               | 0                     | 1                      | 2                                                                          | 1                         | 1                                                   | 0                 |
| Albanes 2011   | 1                                | 1                               | 0                     | 1                      | 2                                                                          | 1                         | 1                                                   | 1                 |
| Buckley 2011   | 1                                | 1                               | 0                     | 1                      | 1                                                                          | 0                         | 1                                                   | 1                 |
| Chornokur 2012 | 1                                | 0                               | 0                     | 1                      | 1                                                                          | 0                         | 0                                                   | 1                 |
| Honda 1988     | 1                                | 1                               | 1                     | 1                      | 2                                                                          | 1                         | 1                                                   | 0                 |
| Hung 2013      | 1                                | 1                               | 1                     | 1                      | 1                                                                          | 1                         | 1                                                   | 1                 |
| Monnsen 1982   | 1                                | 0                               | 0                     | 1                      | 1                                                                          | 1                         | 1                                                   | 0                 |
| Nakata 1995    | 1                                | 1                               | 1                     | 1                      | 1                                                                          | 0                         | 1                                                   | 1                 |

**Supplemental Digital Content-Table 2. Quality assessment of included cohort studies**

| Study             | Selection                                |                                     |                           |                                                                          | Comparability                                                   | Outcome               |                                                 |                                  |
|-------------------|------------------------------------------|-------------------------------------|---------------------------|--------------------------------------------------------------------------|-----------------------------------------------------------------|-----------------------|-------------------------------------------------|----------------------------------|
|                   | Representativeness of the exposed cohort | Selection of the non exposed cohort | Ascertainment of exposure | Demonstration that outcome of interest was not present at start of study | Comparability of cohorts on the basis of the design or analysis | Assessment of outcome | Was follow-up long enough for outcomes to occur | Adequacy of follow up of cohorts |
| Greenwald 1974    | 1                                        | 1                                   | 1                         | 1                                                                        | 1                                                               | 1                     | 1                                               | 1                                |
| Hartman 1998      | 1                                        | 0                                   | 1                         | 0                                                                        | 1                                                               | 0                     | 1                                               | 1                                |
| Armenian 1974     | 0                                        | 1                                   | 1                         | 1                                                                        | 1                                                               | 1                     | 1                                               | 1                                |
| Chokkalingam 2003 | 1                                        | 0                                   | 1                         | 1                                                                        | 1                                                               | 1                     | 1                                               | 1                                |
| Orsted 2011       | 1                                        | 1                                   | 1                         | 1                                                                        | 2                                                               | 1                     | 1                                               | 1                                |
| Schenk 2011       | 1                                        | 1                                   | 1                         | 1                                                                        | 2                                                               | 1                     | 1                                               | 1                                |
| Kang 2007         | 0                                        | 1                                   | 1                         | 1                                                                        | 2                                                               | 1                     | 1                                               | 1                                |
| Zhou 2015         | 1                                        | 0                                   | 0                         | 1                                                                        | 1                                                               | 0                     | 1                                               | 1                                |
| Tseng 2013        | 1                                        | 1                                   | 1                         | 0                                                                        | 1                                                               | 1                     | 1                                               | 1                                |

Supplemental Digital Content-Table 3. Sensitivity analysis of benign prostatic hyperplasia and the risk of urogenital cancers.

|                                                                       | Number<br>of studies | Relative Risk<br>(95%CI) | Heterogeneity                |
|-----------------------------------------------------------------------|----------------------|--------------------------|------------------------------|
| <b>Prostate cancer</b>                                                |                      |                          |                              |
| Excluding studies with high risk of bias*                             | 17                   | 2.84 (1.75, 4.60)        | $I^2 = 97\%$ ; $P < 0.00001$ |
| Excluding studies without matching or adjusting any factor            | 18                   | 3.16 (1.94, 5.15)        | $I^2 = 97\%$ ; $P < 0.00001$ |
| Excluding single-arm cohort studies                                   | 19                   | 3.07 (1.94, 4.85)        | $I^2 = 97\%$ ; $P < 0.00001$ |
| Excluding studies which did not report the detailed definition of BPH | 9                    | 2.22 (0.98, 5.05)        | $I^2 = 89\%$ ; $P < 0.00001$ |
| <b>Bladder cancer</b>                                                 |                      |                          |                              |
| Excluding studies with high risk of bias*                             | 4                    | 1.70 (1.31, 2.22)        | $I^2 = 52\%$ ; $P = 0.10$    |
| Excluding studies without matching or adjusting any factor            | 4                    | 1.84 (1.62, 2.09)        | $I^2 = 0\%$ ; $P = 0.54$     |
| Excluding studies undertaken in patients with diabetes                | 5                    | 1.71 (1.22, 2.40)        | $I^2 = 38\%$ ; $P = 0.17$    |
| Excluding single-arm cohort studies                                   | 9                    | 3.07 (1.94, 4.85)        | $I^2 = 97\%$ ; $P < 0.00001$ |
| Excluding studies which did not report the detailed definition of BPH | 2                    | 2.08 (1.47, 2.95)        | $I^2 = 75\%$ ; $P = 0.0.4$   |

\*High risk of bias was defined as having a Newcastle-Ottawa Scale score < 7 points.

CI: Confidence Interval

Prostate cancer

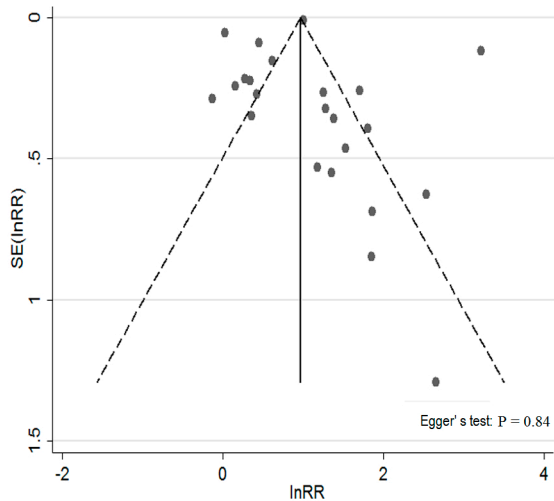

Bladder cancer

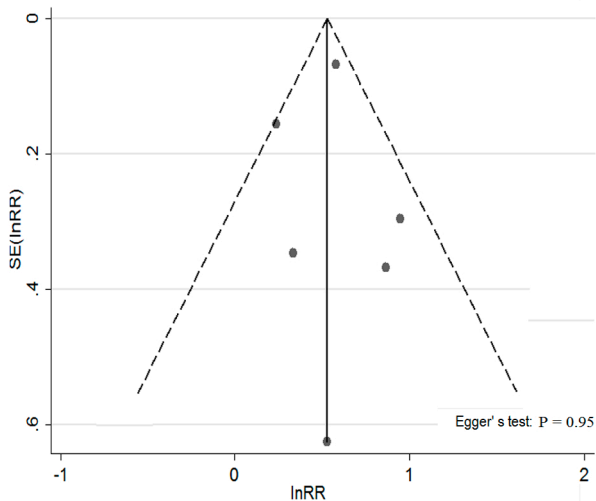

Figure. Evaluation of the risk of publication bias

## Reference of included studies

- S1. Hartman T, Albanes D, Pietinen P, et al. The association between baseline vitamin E, selenium, and prostate cancer in the Alpha-Tocopherol, Beta-Carotene Cancer Prevention Study. *Cancer Epidemiology Biomarkers & Prevention*. 1998; 7: 335-340
- S2. Orsted D, Bojesen S, Nielsen S, et al. Association of clinical benign prostate hyperplasia with prostate cancer incidence and mortality revisited: A nationwide cohort study of 3 009 258 men. *European Urology*. 2011; 60: 691-698
- S3. Schenk JM, Kristal AR, Arnold KB, et al. Association of symptomatic benign prostatic hyperplasia and prostate cancer: results from the prostate cancer prevention trial. *American Journal of Epidemiology*. 2011; 173: 1419 -1428
- S4. Kang D, Chokkalingam A, Gridley G et al. Benign prostatic hyperplasia and subsequent risk of bladder cancer. *British Journal of Cancer*. 2007; 96: 1475-1479
- S5. Tseng C. Benign prostatic hyperplasia is a significant risk factor for bladder cancer in diabetic patients: A population-based cohort study using the National Health Insurance in Taiwan. *BMC Cancer*. 2013; 13: 7
- S6. Greenwald P, Kirmss V, Polan A, et al. Cancer of the prostate among men with benign prostatic hyperplasia. *Journal of the National Cancer Institute*. 1974; 53: 335-340
- S7. Wei Q, Tang X, Yang Y, et al. A case-control study of the risk factors for prostate cancer. *Journal of West China University of Medical Sciences* 1994; 25: 87-90
- S8. An N, Pang W, Liu Y. Case-control Study on the Relationship Between Prostate Cancer and History of Prostatic Diseases. *Chin J Prev Contr Chron Non-commun Dis* 2000; 8: 214-215
- S9. Albanes D, Weinstein SJ, Snyder K, et al. Circulating 25-hydroxyvitamin D and prostate cancer risk in a large male cohort. *Cancer Research*. 2010; 70: S2796
- S10. Coker A, Sanderson M, Zheng W, et al. Diabetes mellitus and prostate cancer risk among older men: Population-based case-control study. *British Journal of Cancer*. 2004; 90: 2171-2175
- S11. Mommsen S, Aagaard J, Sell A. An epidemiological case-control study of bladder cancer in males from a predominantly rural district. *Eur J Cancer Clin Oncol*. 1982; 18: 1205-1210
- S12. Mishina T, Watanabe H, Araki H, et al. Epidemiological study of prostatic cancer by matched-pair analysis. *Prostate*. 1985; 6: 423-436
- S13. Zhou J, Kelsey KT, Smith S, et al. Lower Urinary Tract Symptoms and Risk of Bladder Cancer in Men: Results From the Health Professionals Follow-up Study. *Urology*. 2015;85:1312-8
- S14. Chokkalingam A, Nyren O, Johansson J et al. Prostate carcinoma risk subsequent to diagnosis of benign prostatic hyperplasia: a population-based cohort study in Sweden. *Cancer*. 2003; 98: 1727-1734
- S15. Liu C, Yang Z, Li S. Prostate Diseases, Sexuality and Prostate Cancer: a Case-control Study. *Medical Journal of Wuhan University*. 2007; 28: 219-221
- S16. Armenian HK, Lilienfeld AM, Diamond EL, et al. Relation between benign prostatic hyperplasia and cancer of the prostate. A prospective and retrospective study. *Lancet*. 1974; 2: 115-117
- S17. Simons BD, Morrison AS, Young RH, et al. The relation of surgery for prostatic hypertrophy to carcinoma of the prostate. *American Journal of Epidemiology*. 1993; 138: 294-300
- S18. Chornokur G, Han G, Tanner R et al. Risk factors of prostate cancer in African American men. *Cancer Research*. 2012; 72: S3592
- S19. Buckley B, Lapitan M, Simpson C, et al. Risk of prostate cancer associated with benign prostate disease: a primary care case-control study. *British Journal of General Practice*. 2011; 61: 684-691
- S20. Wang R, Gu L, Ann H, et al. Sexual behavior, non-cancerous diseases and prostatic cancer : a case-control study. *Chin J Urol*. 1996; 17: 481-487
- S21. Hung S, Lai S, Tsai P, et al.: Synergistic interaction of benign prostatic hyperplasia and prostatitis on prostate cancer risk. *British Journal of Cancer*. 2013; 108: 1778-1783
- S22. Zhu K, Stanford JL, Daling JR, et al. Vasectomy and prostate cancer: a case-control study in a health maintenance organization. *Am J Epidemiol*. 1996; 144: 717-722
- S23. Honda G, Bernstein L, Ross R, et al. Vasectomy, cigarette smoking, and age at first sexual intercourse as risk factors for prostate cancer in middle-aged men. *British Journal of Cancer*. 1988; 57: 326-331
- S24. Nakata S, Sato J, Ohtake N, et al. Epidemiological study of risk factors for bladder cancer. *Hinyokika Kyo*.1995; 41: 969-977
